# Supplementary material
Source: PubMed Central journal article supplement (PMC4111986)
Supplement: NIHMS584438-supplement-01.pdf [file NIHMS584438-supplement-01.pdf]

**Table S1.** Sensitivity analysis comparing the association of estimated GFR with specific serum 24,25(OH)<sub>2</sub>D<sub>3</sub> concentration to the association of estimated GFR with the summed concentration of dihydroxyvitamin D<sub>3</sub> metabolites (24,25(OH)<sub>2</sub>D<sub>3</sub> and its interfering analyte(s)) among 932 participants in the Cardiovascular Health Study.

|                                            | Specific serum 24,25(OH) <sub>2</sub> D <sub>3</sub> concentration |                      | Summed dihydroxyvitamin D <sub>3</sub> metabolites |                      |
|--------------------------------------------|--------------------------------------------------------------------|----------------------|----------------------------------------------------|----------------------|
|                                            | Slope                                                              | Intercept            | Slope                                              | Intercept            |
| Estimated GFR (mL/min/1.73m <sup>2</sup> ) |                                                                    |                      |                                                    |                      |
| ≥ 90                                       | 1.13 (0.78 to 1.49)                                                | 2.11 (1.65 to 2.57)  | 1.29 (0.87 to 1.7)                                 | 2.74 (2.21 to 3.28)  |
| 60-89                                      | 1.13 (0.95 to 1.31)                                                | 1.88 (1.63 to 2.13)  | 1.29 (1.08 to 1.5)                                 | 2.52 (2.24 to 2.81)  |
| 45-59                                      | 0.9 (0.71 to 1.09)                                                 | 1.82 (1.56 to 2.09)  | 1.04 (0.82 to 1.26)                                | 2.45 (2.14 to 2.75)  |
| 30-44                                      | 0.86 (0.65 to 1.08)                                                | 1.47 (1.13 to 1.8)   | 1.04 (0.79 to 1.28)                                | 2 (1.62 to 2.39)     |
| 15-29                                      | 0.92 (0.47 to 1.36)                                                | 1.18 (0.64 to 1.72)  | 1.05 (0.54 to 1.56)                                | 1.82 (1.19 to 2.44)  |
| < 15                                       | 0.26 (-1.98 to 2.5)                                                | 0.80 (-0.83 to 2.43) | 0.02 (-2.57 to 2.61)                               | 1.03 (-0.86 to 2.92) |

Reported are the results of two multivariable regression models. The first evaluates the circulating concentration of specific 24,25(OH)<sub>2</sub>D<sub>3</sub> concentration as dependent variable. The second evaluates the summed concentration of dihydroxyvitamin D<sub>3</sub> metabolites (24,25(OH)<sub>2</sub>D<sub>3</sub> and its interfering analyte(s)) as dependent variable. In addition to circulating 25-hydroxyvitamin D<sub>3</sub> concentration, each model includes age, sex, race/ethnicity, diabetes, body mass index, estimated GFR, urine ACR, and interactions of each of these variables with circulating 25-hydroxyvitamin D<sub>3</sub> concentration as independent variables. Estimates are reported at mean values of the other independent variables. Slope is the increment in 24,25(OH)<sub>2</sub>D<sub>3</sub> per increment in 25(OH)D<sub>3</sub> (in ng/mL per 10 ng/mL). Intercept is the mean 24,25(OH)<sub>2</sub>D<sub>3</sub> at 25(OH)D<sub>3</sub> = 20 ng/mL (in ng/mL).
