# Supplementary material
Source: PubMed Central journal article supplement (PMC4111986)

**Figure S1.** Correlation of the serum concentrations of summed dihydroxyvitamin D<sub>3</sub> metabolites with specific 24,25(OH)<sub>2</sub>D<sub>3</sub> among 932 participants in the Cardiovascular Health Study. Pearson r=0.99.

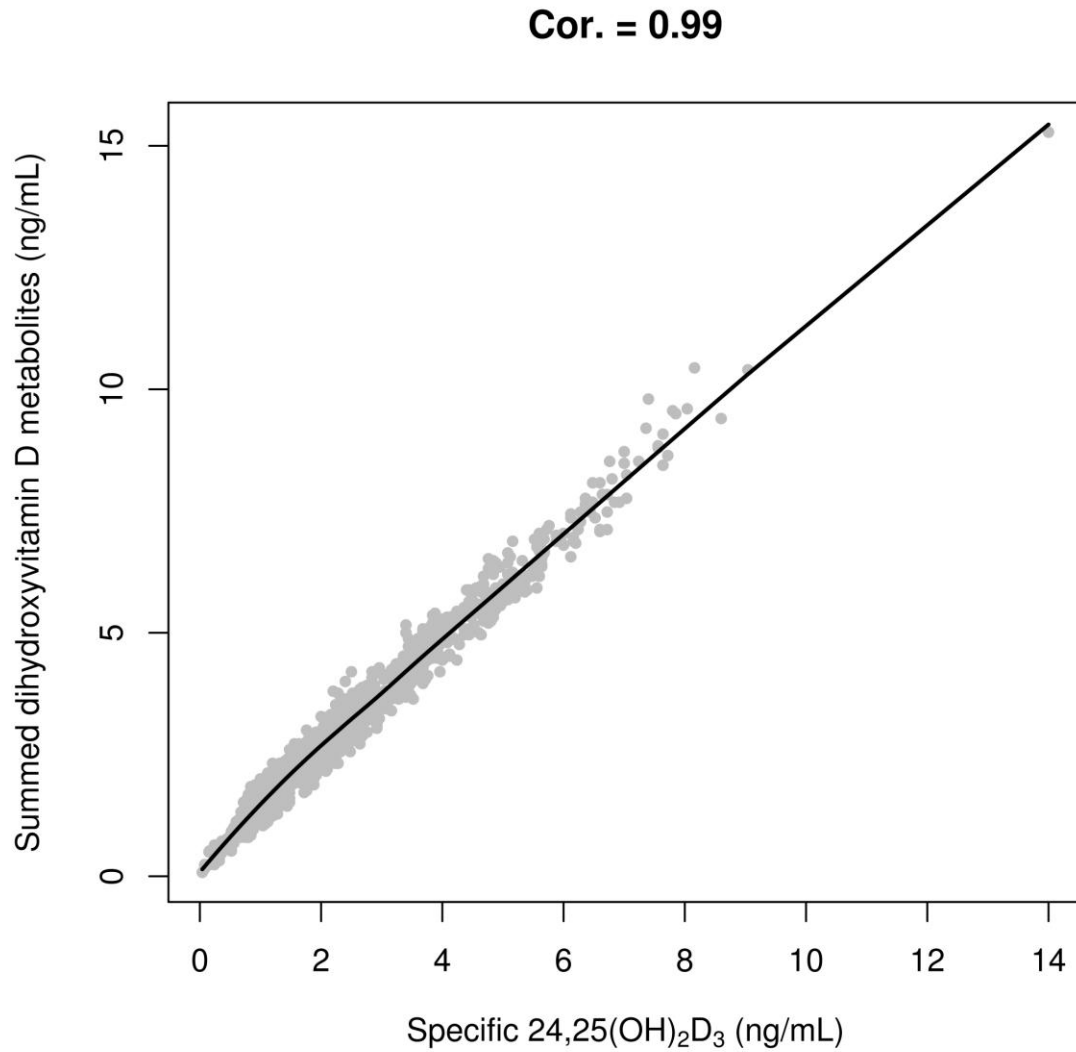

Supplement: NIHMS584438-supplement-02.pdf [file NIHMS584438-supplement-02.pdf]
