# Supplementary material
Source: PubMed Central journal article supplement (PMC4111986)

**Figure S2.** Correlation of the serum concentrations of summed dihydroxyvitamin D<sub>3</sub> metabolites with specific 24,25(OH)<sub>2</sub>D<sub>3</sub> among 712 participants in the Hemodialysis Trial. Pearson r=0.82.

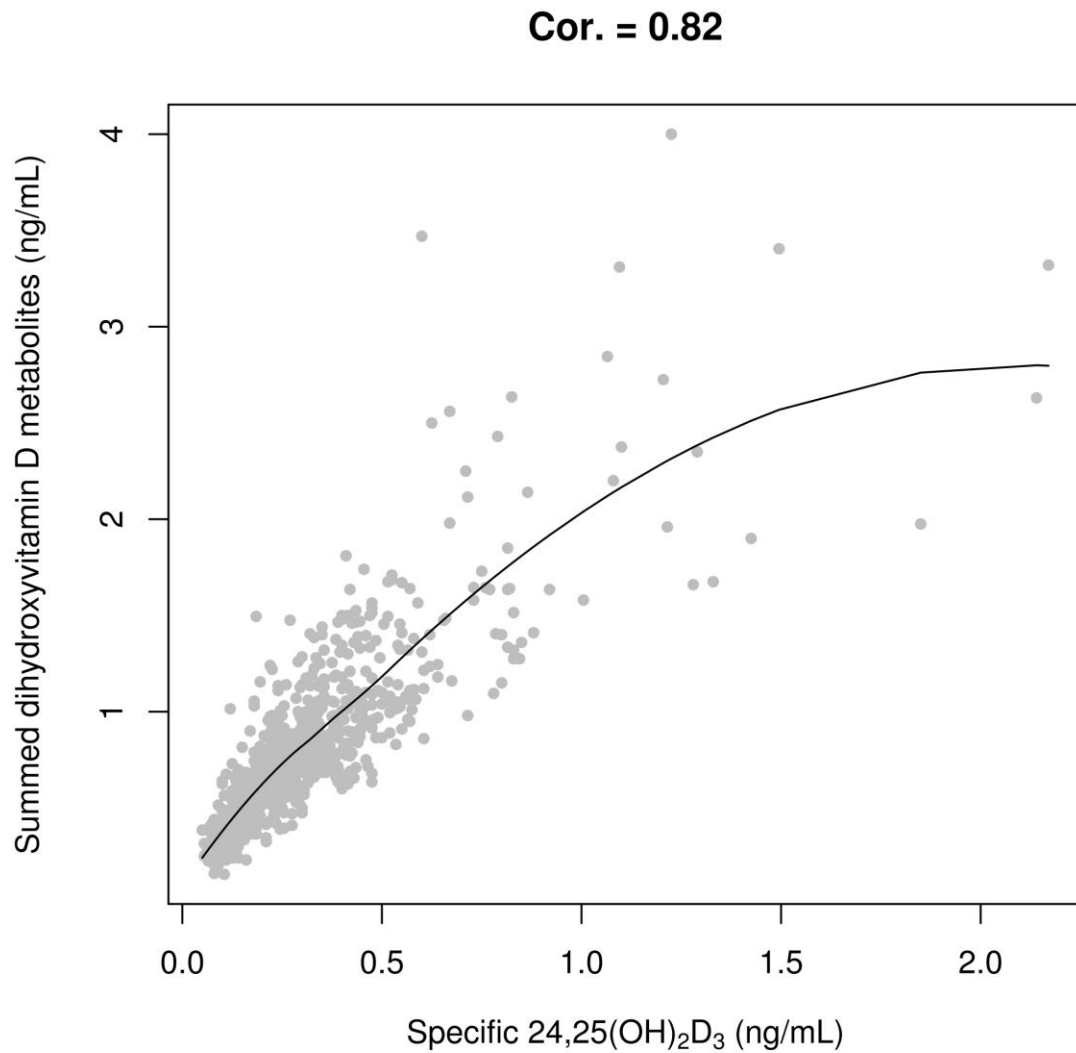

Supplement: NIHMS584438-supplement-03.pdf [file NIHMS584438-supplement-03.pdf]
